# Supplementary material for: Emission tuning in dinuclear gold complexes with diphosphanes containing alkyne and/or oligophenylene spacers
Source: Royal Society of Chemistry journal article supplement (doi:10.1039/c2dt31019h), 2012-01-01
Supplement: c2dt31019h.pdf [file c2dt31019h.pdf]

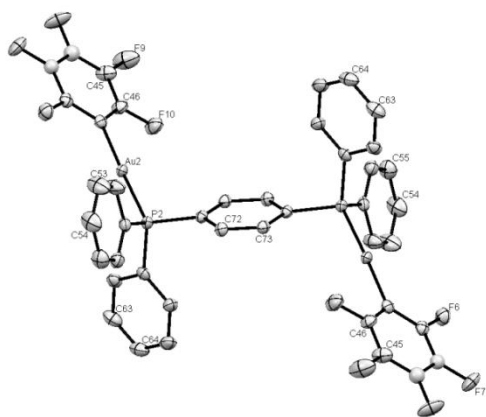

Figure SF1.-Ortep representation of complex **7**. Hydrogen atoms have been omitted for the sake of clarity. The thermal ellipsoids are drawn at 50% of probability.

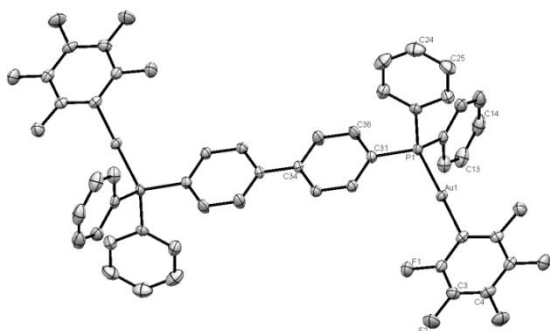

Figure SF2.-Ortep representation of complex **8**. Hydrogen atoms have been omitted for the sake of clarity. The thermal ellipsoids are drawn at 50% of probability.

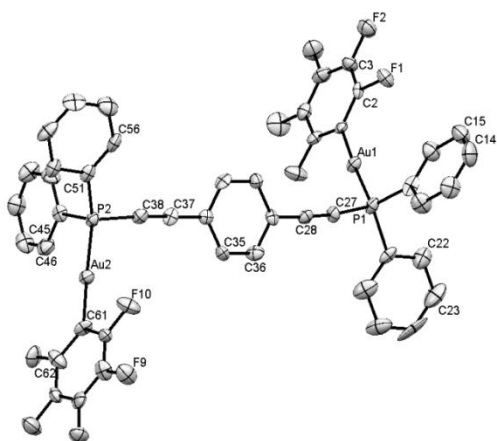

Figure SF3.-Ortep representation of complex **12**. Hydrogen atoms have been omitted for the sake of clarity. The thermal ellipsoids are drawn at 50% of probability.

## Description of the $\pi$ - $\pi$ interactions

**Compound 7:** distances between centroids of rings 1 and 2 (see figure 1 in the text) and those between centroids of rings 3 and 4 are the same, 3.914 Å. Distance between centroids of rings 2 and 3 is 3.564 Å. The distances between the centroids of rings 1 and 4 to the planes formed by rings 2 and 3, respectively, are the same, 3.533 Å. That of the centroid of ring 2 to the plane formed by ring 3 is 3.397 Å. Displacement angles are 20.6°, between rings 1 and 2, 3 and 4 and 22.1° between rings 2-3.

**Compound 8:** distances between centroids of rings 1 and 2 is 3.677 Å, that between centroids of rings 2 and 3 is 4.195 Å. Distance between centroids of rings 1 and 3 and the plane formed by ring 2 are 3.509 and 3.364 Å. The displacement plane between rings 1 and 2 is 17.33° and 36.36° between 2 and 3.

**Compound 12:** The distances between centroids of rings 1-2 and 2-3 (see figure 3 in the text in which three rings have been numbered) are 3.676 and 4.198 Å respectively, and the distances between the centroid of ring 1 and the plane containing ring 2 is 3.384 Å; that between the centroid of ring 3 and the plane containing ring 2 is 3.318 Å. The displacement angles are 21.03° between rings 1 and 2 and 17.7° between rings 2 and 3.

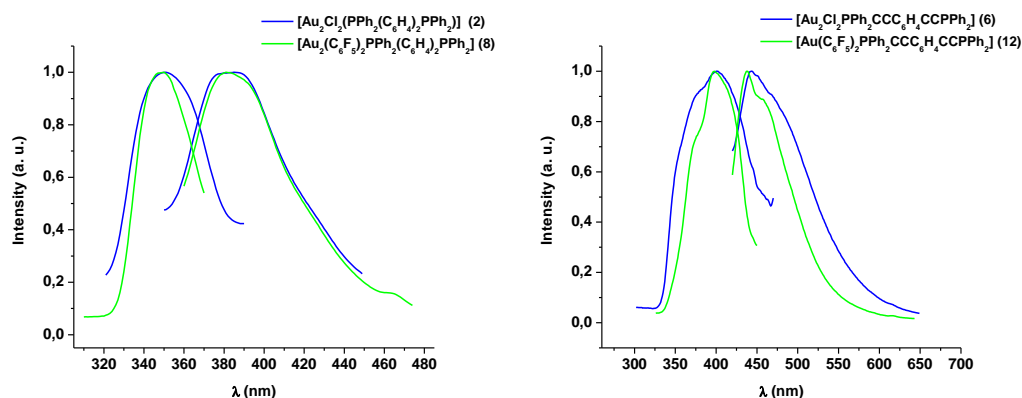

Figure SF4. Left: Normalized excitation (left) and emission (right) for chloro and pentafluorophenyl complexes with the  $\text{PPh}_2\text{C}_6\text{H}_4\text{PPh}_2$  diphosphine in the solid state at 298 K. Right: Normalized excitation (left) and emission (right) for chloro and pentafluorophenyl complexes with the  $\text{PPh}_2\text{C}\equiv\text{CC}_6\text{H}_4\text{C}\equiv\text{CPPH}_2$  diphosphine in the solid state at 298 K.

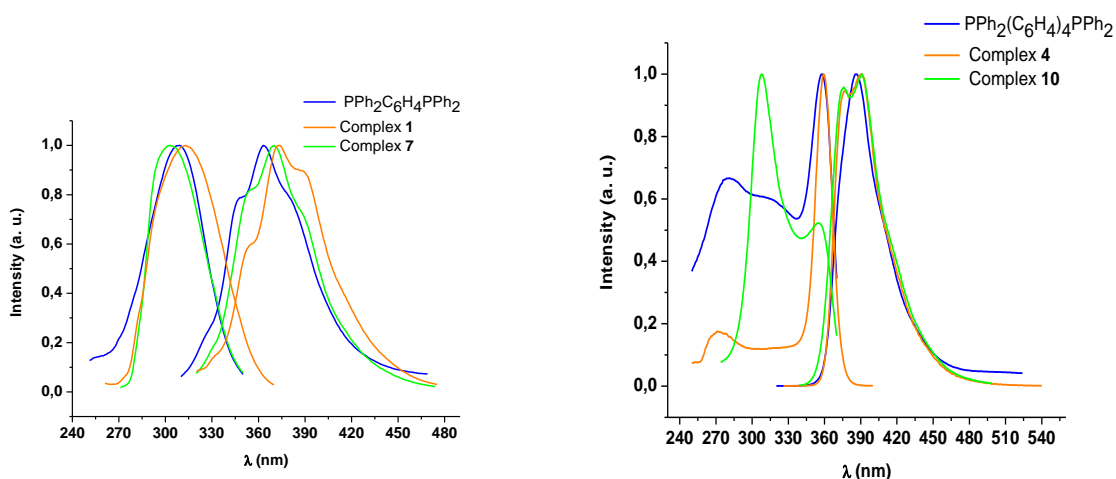

Figure SF6.-Left: Normalized excitation (left) and emission (right) spectra of the diphosphine  $\text{PPh}_2\text{C}_6\text{H}_4\text{PPh}_2$  and the complexes **1** and **7** in solution at 298 K. Right: Normalized excitation (left) and emission (right) spectra of the diphosphine  $\text{PPh}_2(\text{C}_6\text{H}_4)_4\text{PPh}_2$  and the complexes **4** and **10** in solution at 298 K



Table ST1. UV/vis and RDUV data for complexes **1-12**

| Compound                                                                                                                                             | UV<br>$\lambda_{\max}^a$ ( $\epsilon \times 10^{-4}$ ) <sup>b</sup> | RDUV<br>$\lambda_{\max}^a$ |
|------------------------------------------------------------------------------------------------------------------------------------------------------|---------------------------------------------------------------------|----------------------------|
| PPh <sub>2</sub> (C <sub>6</sub> H <sub>4</sub> )PPh <sub>2</sub>                                                                                    | 230 (2.5)<br>275 (2.0)                                              | 295                        |
| [(AuCl) <sub>2</sub> (PPh <sub>2</sub> (C <sub>6</sub> H <sub>4</sub> )PPh <sub>2</sub> )] ( <b>1</b> )                                              | 235 (3.8)<br>260 (2.2)                                              | 285                        |
| [{Au(C <sub>6</sub> F <sub>5</sub> ) <sub>2</sub> (PPh <sub>2</sub> (C <sub>6</sub> H <sub>4</sub> )PPh <sub>2</sub> )}] ( <b>7</b> )                | 235 (5.4)<br>260 (3.4)                                              | 280                        |
| PPh <sub>2</sub> (C <sub>6</sub> H <sub>4</sub> ) <sub>2</sub> PPh <sub>2</sub>                                                                      | 230 (3.0)<br>287 (3.0)                                              | 308                        |
| [(AuCl) <sub>2</sub> (PPh <sub>2</sub> (C <sub>6</sub> H <sub>4</sub> ) <sub>2</sub> PPh <sub>2</sub> )] ( <b>2</b> )                                | 230 (3.7)<br>285 (4.2)                                              | 300                        |
| [{Au(C <sub>6</sub> F <sub>5</sub> ) <sub>2</sub> (PPh <sub>2</sub> (C <sub>6</sub> H <sub>4</sub> ) <sub>2</sub> PPh <sub>2</sub> )}] ( <b>8</b> )  | 230 (3.8)<br>285 (3.4)                                              | 300                        |
| PPh <sub>2</sub> (C <sub>6</sub> H <sub>4</sub> ) <sub>3</sub> PPh <sub>2</sub>                                                                      | 230 (1.2)<br>285 (2.7)                                              | 315                        |
| [(AuCl) <sub>2</sub> (PPh <sub>2</sub> (C <sub>6</sub> H <sub>4</sub> ) <sub>3</sub> PPh <sub>2</sub> )] ( <b>3</b> )                                | 230 (4.2)<br>300 (5.0)                                              | 315                        |
| [{Au(C <sub>6</sub> F <sub>5</sub> ) <sub>2</sub> (PPh <sub>2</sub> (C <sub>6</sub> H <sub>4</sub> ) <sub>3</sub> PPh <sub>2</sub> )}] ( <b>9</b> )  | 235 (4.4)<br>300 (3.6)                                              | 315                        |
| PPh <sub>2</sub> (C <sub>6</sub> H <sub>4</sub> ) <sub>4</sub> PPh <sub>2</sub>                                                                      | 229 (1.0)<br>314 (2.2)                                              | 233<br>330                 |
| [(AuCl) <sub>2</sub> (PPh <sub>2</sub> (C <sub>6</sub> H <sub>4</sub> ) <sub>4</sub> PPh <sub>2</sub> )] ( <b>4</b> )                                | 229 (1.6)<br>314 (2.8)                                              | 332                        |
| [{Au(C <sub>6</sub> F <sub>5</sub> ) <sub>2</sub> (PPh <sub>2</sub> (C <sub>6</sub> H <sub>4</sub> ) <sub>4</sub> PPh <sub>2</sub> )}] ( <b>10</b> ) | 230 (3.2)<br>315 (3.4)                                              | 330                        |
| PPh <sub>2</sub> (C <sub>6</sub> H <sub>4</sub> ) <sub>5</sub> PPh <sub>2</sub>                                                                      | 228 (1.3)<br>320 (3.1)                                              | 338                        |
| [(AuCl) <sub>2</sub> (PPh <sub>2</sub> (C <sub>6</sub> H <sub>4</sub> ) <sub>5</sub> PPh <sub>2</sub> )] ( <b>5</b> )                                | 229 (1.7)<br>322 (3.4)                                              | 343                        |
| [{Au(C <sub>6</sub> F <sub>5</sub> ) <sub>2</sub> (PPh <sub>2</sub> (C <sub>6</sub> H <sub>4</sub> ) <sub>5</sub> PPh <sub>2</sub> )}] ( <b>11</b> ) | 230 (2.7)<br>322 (3.4)                                              | 342                        |
| [(AuCl) <sub>2</sub> (PPh <sub>2</sub> C≡CC <sub>6</sub> H <sub>4</sub> C≡CPh <sub>2</sub> )] ( <b>6</b> )                                           | 232 (1.8)<br>294 (2.5)<br>341 (2.9)                                 | 315                        |
| [{Au(C <sub>6</sub> F <sub>5</sub> ) <sub>2</sub> (PPh <sub>2</sub> C≡CC <sub>6</sub> H <sub>4</sub> C≡CPh <sub>2</sub> )}] ( <b>12</b> )            | 233 (1.6)<br>294 (2.2)<br>312 (2.5)                                 | 311                        |

<sup>a</sup> $\lambda_{\max}$  in nm, <sup>b</sup>  $\epsilon$  in dm<sup>3</sup>·mol<sup>-1</sup>·cm<sup>-1</sup> in solution 5·10<sup>-5</sup> M

Table TS2. Excitation and emission maxima ( $\lambda_{\text{MAX}}$ ) in nm of complexes **1-12** in the solid state

| Compound                                                                                                                                   | 298 K                     |                | 77 K            |                                  |
|--------------------------------------------------------------------------------------------------------------------------------------------|---------------------------|----------------|-----------------|----------------------------------|
|                                                                                                                                            | Excitation                | Emission       | Excitation      | Emission                         |
| $\text{PPh}_2(\text{C}_6\text{H}_4)\text{PPh}_2$                                                                                           | 270, 370, 400<br>360, 400 | 445<br>470     | 330, 405        | 480                              |
| $[(\text{AuCl})_2(\text{PPh}_2(\text{C}_6\text{H}_4)\text{PPh}_2)]$ ( <b>1</b> )                                                           | 310, 345                  | 385            | 270, 330        | 385, 405, 425, 455, 485*         |
| $[\{\text{Au}(\text{C}_6\text{F}_5)\}_2(\text{PPh}_2(\text{C}_6\text{H}_4)\text{PPh}_2)]$ ( <b>7</b> )                                     | 330, 350                  | 385            | 280, 360        | 380, 400, 420*                   |
| $\text{PPh}_2(\text{C}_6\text{H}_4)_2\text{PPh}_2$                                                                                         | 370                       | 470            | 335<br>370      | 430<br>500                       |
| $[(\text{AuCl})_2(\text{PPh}_2(\text{C}_6\text{H}_4)_2\text{PPh}_2)]$ ( <b>2</b> )                                                         | 350                       | 385            | 320<br>350      | 390<br>465, 500, 530*            |
| $[\{\text{Au}(\text{C}_6\text{F}_5)\}_2(\text{PPh}_2(\text{C}_6\text{H}_4)_2\text{PPh}_2)]$ ( <b>8</b> )                                   | 350                       | 385            | 275<br>340      | 380<br>500                       |
| $\text{PPh}_2(\text{C}_6\text{H}_4)_3\text{PPh}_2$                                                                                         | 370, 440<br>270, 405      | 450<br>490     | 275, 390        | 480                              |
| $[(\text{AuCl})_2(\text{PPh}_2(\text{C}_6\text{H}_4)_3\text{PPh}_2)]$ ( <b>3</b> )                                                         | 275, 370, 400             | 385(sh), 425*  | 275, 355        | 365, 385, 425*<br>520, 555, 600* |
| $[\{\text{Au}(\text{C}_6\text{F}_5)\}_2(\text{PPh}_2(\text{C}_6\text{H}_4)_3\text{PPh}_2)]$ ( <b>9</b> )                                   | 280, 360, 400             | 385(sh), 420*  | 275, 360        | 365, 385, 415*<br>515, 550, 600* |
| $\text{PPh}_2(\text{C}_6\text{H}_4)_4\text{PPh}_2$                                                                                         | 275, 375, 410             | 436, 480*      | 278, 385        | 403, 427, 453*                   |
| $[(\text{AuCl})_2(\text{PPh}_2(\text{C}_6\text{H}_4)_4\text{PPh}_2)]$ ( <b>4</b> )                                                         | 345                       | 407            | 305, 380        | 410                              |
| $[\{\text{Au}(\text{C}_6\text{F}_5)\}_2(\text{PPh}_2(\text{C}_6\text{H}_4)_4\text{PPh}_2)]$ ( <b>10</b> )                                  | 280, 370                  | 405            | 280, 370        | 400                              |
| $\text{PPh}_2(\text{C}_6\text{H}_4)_5\text{PPh}_2$                                                                                         | 277, 370, 400             | 423, 445, 478* | 277, 375        | 400, 423, 445, 478*              |
| $[(\text{AuCl})_2(\text{PPh}_2(\text{C}_6\text{H}_4)_5\text{PPh}_2)]$ ( <b>5</b> )                                                         | 280, 378                  | 427            | 278, 385        | 417, 435*                        |
| $[\{\text{Au}(\text{C}_6\text{F}_5)\}_2(\text{PPh}_2(\text{C}_6\text{H}_4)_5\text{PPh}_2)]$ ( <b>11</b> )                                  | 280, 380                  | 415            | 280, 370        | 395, 420, 440*                   |
| $[(\text{AuCl})_2(\text{PPh}_2\text{C}\equiv\text{CC}_6\text{H}_4\text{C}\equiv\text{C}\text{PPh}_2)]$ ( <b>6</b> )                        | 402                       | 459            | 311, 330, 425   | 512                              |
| $[\{\text{Au}(\text{C}_6\text{F}_5)\}_2(\text{PPh}_2\text{C}\equiv\text{CC}_6\text{H}_4\text{C}\equiv\text{C}\text{PPh}_2)]$ ( <b>12</b> ) | 400                       | 450            | 390<br>345, 410 | 460<br>484, 504, 513, 525, 539*  |

In the excitation spectra values separated by comma indicate more than one maximum of excitation for the same emission. In the emission spectra values separated by comma indicate a structured band. Values marked with \* correspond to the most intense bands. When two emission maxima are observed the corresponding excitation and emission are in the same line.

Table TS3. Excitation and emission maxima ( $\lambda_{MAX}$ ) in nm of complexes **1-12** in solution

| Compound                                                                | 298 K         |                                 | 77 K            |                                            |
|-------------------------------------------------------------------------|---------------|---------------------------------|-----------------|--------------------------------------------|
|                                                                         | Excitation    | Emission                        | Excitation      | Emission                                   |
| $PPh_2(C_6H_4)PPh_2^a$                                                  | 310           | 365*                            | 275, 315        | 450                                        |
| $[(AuCl)_2(PPh_2(C_6H_4)PPh_2)]$ ( <b>1</b> )                           | 310           | 355, 370, 390*                  | 270             | 385, 405, 425, 455, 485*                   |
| $[\{Au(C_6F_5)\}_2(PPh_2(C_6H_4)PPh_2)]$ ( <b>7</b> )                   | 305           | 350, 370, 390*                  | 270, 315        | 410                                        |
| $PPh_2(C_6H_4)_2PPh_2^a$                                                | 250, 285      | 340                             | 270, 340        | 485                                        |
| $[(AuCl)_2(PPh_2(C_6H_4)_2PPh_2)]$ ( <b>2</b> )                         | 320           | 385                             | 280, 320<br>330 | 370<br>465, 495, 525, 570 <sup>a</sup>     |
| $[\{Au(C_6F_5)\}_2(PPh_2(C_6H_4)_2PPh_2)]$ ( <b>8</b> )                 | 320           | 385                             | 275, 310        | 460, 490, 525*                             |
| $PPh_2(C_6H_4)_3PPh_2^a$                                                | 310, 360      | 370<br>420                      | 300, 350        | 445                                        |
| $[(AuCl)_2(PPh_2(C_6H_4)_3PPh_2)]$ ( <b>3</b> )                         | 260, 340      | 355, 370, 390, 410,<br>435*     | 275, 345        | 355, 375, 390, 410, 435*<br>510, 545, 590* |
| $[\{Au(C_6F_5)\}_2(PPh_2(C_6H_4)_3PPh_2)]$ ( <b>9</b> )                 | 270, 340      | 355, 370, 390, 410,<br>435*     | 275, 355        | 355, 375, 390, 410, 435*<br>510, 545, 590* |
| $PPh_2(C_6H_4)_4PPh_2$                                                  | 280, 317, 360 | 387                             | 270, 370        | 390, 436*                                  |
| $[(AuCl)_2(PPh_2(C_6H_4)_4PPh_2)]$ ( <b>4</b> )                         | 308, 355      | 385                             | 330             | 385                                        |
| $[\{Au(C_6F_5)\}_2(PPh_2(C_6H_4)_4PPh_2)]$ ( <b>10</b> )                | 270, 360      | 385                             | 295, 360        | 390                                        |
| $PPh_2(C_6H_4)_5PPh_2$                                                  | 275, 325, 367 | 393                             | 277, 380        | 390, 415, 440 <sup>a</sup>                 |
| $[(AuCl)_2(PPh_2(C_6H_4)_5PPh_2)]$ ( <b>5</b> )                         | 270, 370      | 395                             | 303, 375        | 390, 405, 428*                             |
| $[\{Au(C_6F_5)\}_2(PPh_2(C_6H_4)_5PPh_2)]$ ( <b>11</b> )                | 275, 367      | 395                             | 280, 375        | 390, 410, 430*                             |
| $[(AuCl)_2(PPh_2C\equiv CC_6H_4C\equiv CPPPh_2)]$ ( <b>6</b> )          | 352           | 378, 394, 409, 432 <sup>a</sup> | 273, 335        | 490, 525*                                  |
| $[\{Au(C_6F_5)\}_2(PPh_2C\equiv CC_6H_4C\equiv CPPPh_2)]$ ( <b>12</b> ) | 353           | 377, 394, 409, 431*             | 326             | 489, 520*                                  |

In the excitation spectra values separated by comma indicate more than one maximum of excitation for the same emission. In the emission spectra values separated by comma indicate a structured band. Values marked with \* correspond to the most intense bands. When two emission maxima are observed the corresponding excitation and emission are in the same line. <sup>a</sup> From reference 9d cited in the manuscript.

## THEORETICAL STUDIES

**Figure SF9. Selection of frontier molecular orbitals in complex 7.**



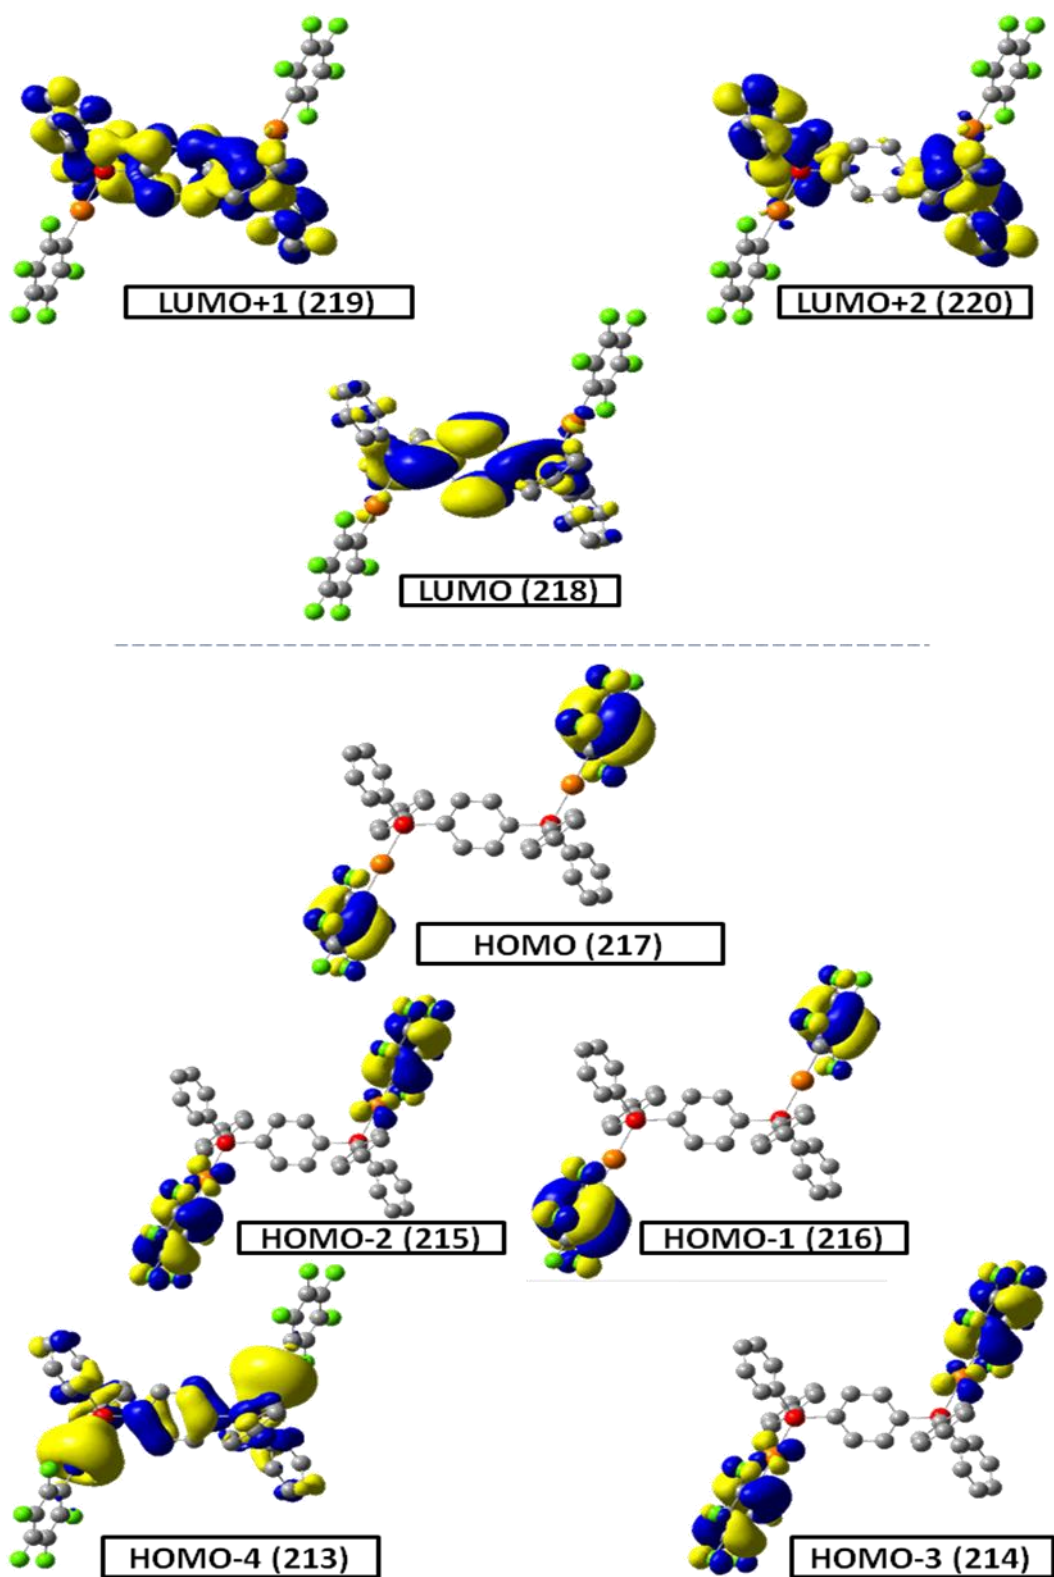

Figure SF8. Selection of frontier molecular orbitals in complex 8.

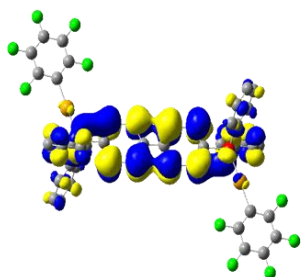

LUMO+1 (239)

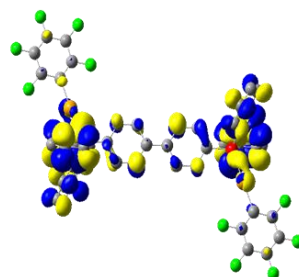

LUMO+2 (240)

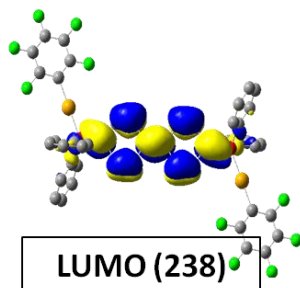

LUMO (238)

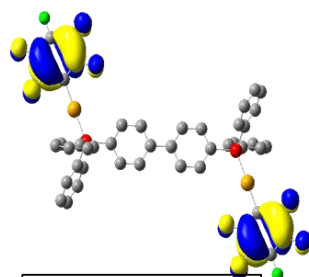

HOMO (237)

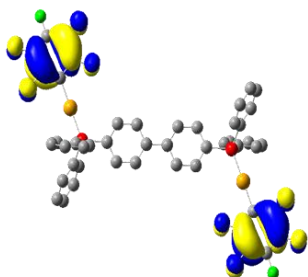

HOMO-1 (236)

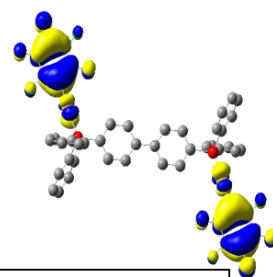

HOMO-2 (235)

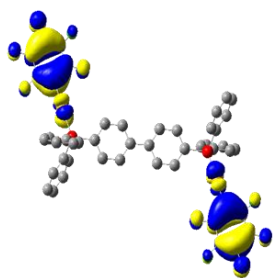

HOMO-3 (234)

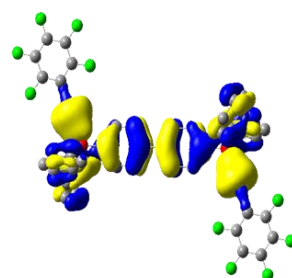

HOMO-4 (233)
